# Supplementary material
Source: publisher figshare collection journal article supplement (https://tandf.figshare.com/ndownloader/files/31262229)
Supplement: Supplementary file 1 [file 31262229]

## Sheet: Table S4
Table S4.Gene expression of S. pneumoniae during colonization of mouse and human URT
Gene expression in vivo was analysed by qPCR analysis on pneumococci obtained by nasal wash from colonized mice or obtained by throath swab from experimentally colonized human volunteers
Cq values of individual mouse and human cDNA samples were determined for 9 genes encoding the selected putative antigens
ND = not detected or Cq value > 39.0
			Mouse #1	Mouse #2		Volunteer #1	Volunteer #2	Volunteer #3	Volunteer #4
	Gene code	Gene name	Cq-value	Cq-value		Cq-value	Cq-value	Cq-value	Cq-value
Putative antigens	SP0268	spuA	37.3535	35.7278		ND	35.7631	ND	ND
	SP0366	aliA	32.5337	32.4912		37.0949	31.8793	32.513	34.3851
	SP2216	pcsB	32.0726	33.1235		31.5683	29.7161	29.4097	29.8821
	SP1002	adcAII	33.7706	33.2374		ND	34.8831	38.045	35.6293
	SP1650	psaA	29.9949	29.5633		29.2188	28.9237	29.4815	33.3803
	SP0749	livJ	33.1243	34.3705		37.501	38.8575	ND	ND
	SP1069	tprX	35.4234	37.2147		35.9487	36.6892	ND	38.1564
	SP0149	metQ	32.5888	32.5625		28.5981	29.4042	30.2005	31.0523
	SP0641	prtA	34.92	33.98		ND	ND	ND	38.2387
